# Supplementary material
Source: ML conference proceedings conference paper supplement (https://openaccess.thecvf.com/content/CVPR_2019/html/Yasarla_Uncertainty_Guided_Multi-Scale_CVPR_2019_paper.html)
Supplement: Supplementary file 1 [file Yasarla_Uncertainty_Guided_Multi-Scale_CVPR_2019_supplemental.pdf]

# Uncertainty Guided Multi-Scale Residual Learning-using a Cycle Spinning CNN for Single Image De-Raining (Supplementary Material)

Anonymous CVPR submission

Paper ID 3404

## 1. Introduction

In this supplementary material, we provide additional quantitative and qualitative performance of UMRL method and compare it against several recent state-of-the-art methods [6, 1, 2, 7, 4, 5].

## 2. Quantitative Analysis

We compare the performance of UMRL with cycle spinning on the *Rain800* dataset from [3]. As can be seen from Table 1 that UMRL outperforms RESCAN [5](ECCV'18) and many other recent methods.

Table 1: Quantitative performance of UMRL with cycle spinning.

| Dataset      | <i>Rain800</i> |             |
|--------------|----------------|-------------|
| Measure      | PSNR           | SSIM        |
| DSC [6]      | 18.56          | 0.60        |
| DDN [2]      | 21.16          | 0.73        |
| JORDER [7]   | 22.24          | 0.78        |
| JORDER-R [7] | 22.29          | 0.79        |
| RESCAN[5]    | 24.37          | 0.84        |
| ours         | <b>24.59</b>   | <b>0.87</b> |

## 3. Qualitative Analysis

We also provide some additional results on both synthetic and real-world rainy images.

## References

- [1] X. Fu, J. Huang, X. Ding, Y. Liao, and J. Paisley. Clearing the skies a deep network architecture for single-image rain removal. *IEEE Transactions on Image Processing*, 26:2944–2956, 2017. 1, 2, 3, 4, 5, 6
- [2] X. Fu, J. Huang, D. Zeng, X. Ding, Y. Liao, and J. Paisley. Removing rain from single images via a deep detail network. *In 2017 IEEE Conference on Computer Vision and Pattern Recognition (CVPR)*, pages 1715–1723, 2017. 1, 2, 3, 4, 5, 6
- [3] Z. He and V. M. Patel. Image de-raining using a conditional generative adversarial network. *arXiv preprint arXiv:1701.05957*, 2017. 1
- [4] Z. He and V. M. Patel. Density-aware single image de-raining using a multi-stream dense network. *In IEEE Conference on Computer Vision and Pattern Recognition (CVPR)*, abs/1802.07412, 2018. 1, 2, 3, 4, 5, 6
- [5] X. Li, J. Wu, Z. Lin, H. Liu, and H. Zha. Recurrent squeeze-and-excitation context aggregation net for single image deraining. *In: European Conference on Computer Vision (ECCV)*, pages 262–277, 2018. 1
- [6] Y. Luo, Y. Xu, and H. Ji. Removing rain from a single image via discriminative sparse coding. *In: IEEE International Conference on Computer Vision (ICCV)*, pages 3397–3405, 2013. 1
- [7] W. Yang, R. T. Tan, J. Feng, J. Liu, and S. Yan. Deep joint rain detection and removal from a single image. *In Proceedings of the IEEE Conference on Computer Vision and Pattern Recognition*, pages 1357–1366, 2017. 1

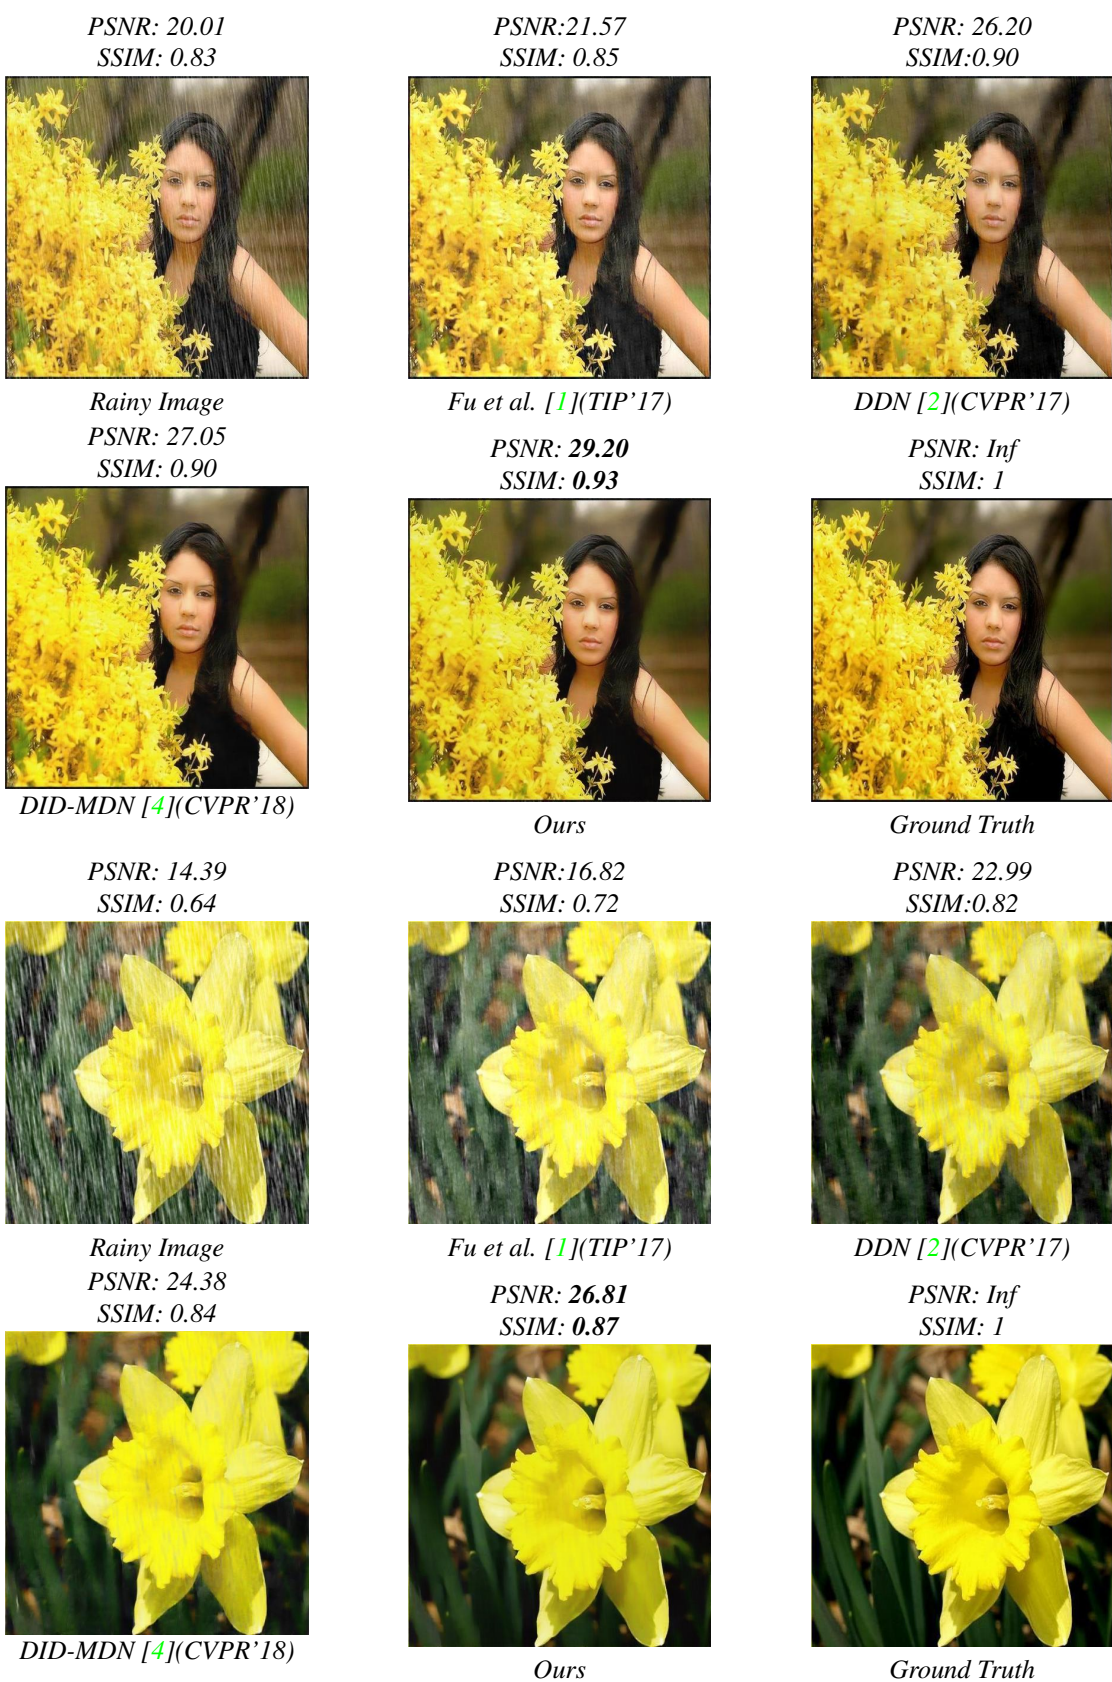

Figure 1: De-rained results on synthetic images from *Test-2* dataset from [1].



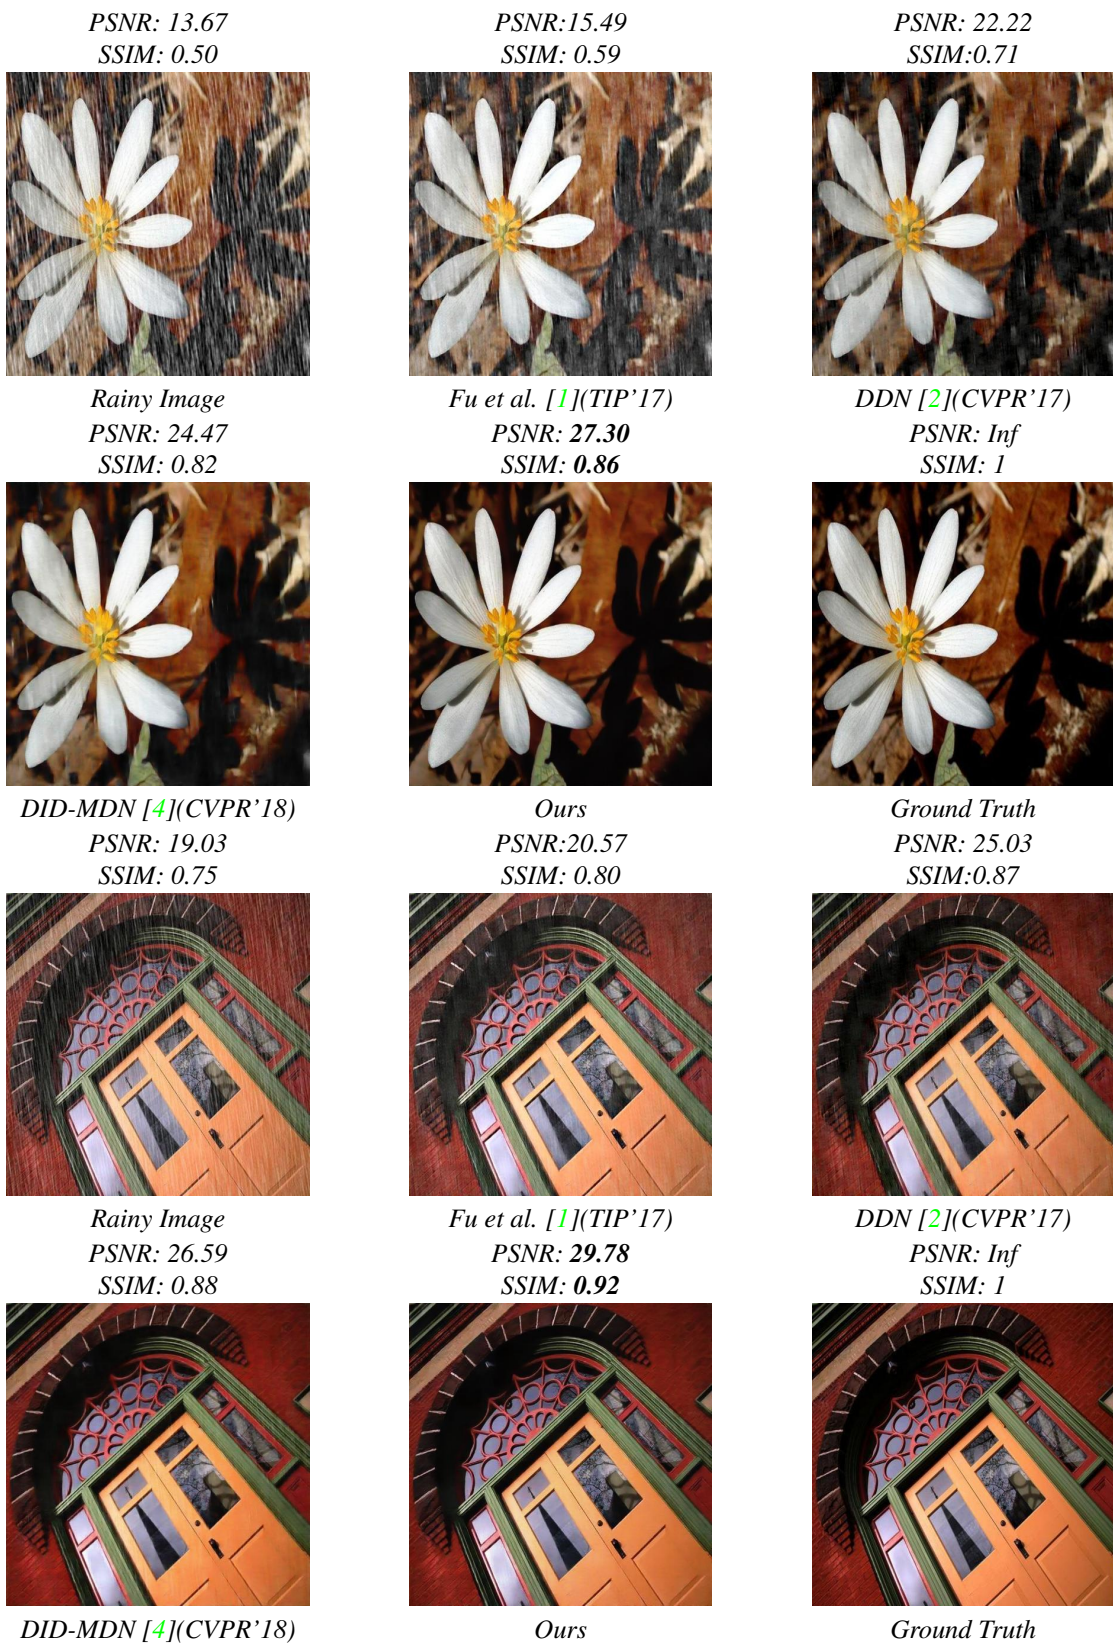

Figure 2: De-rained results on synthetic images from *Test-2* dataset from [1].

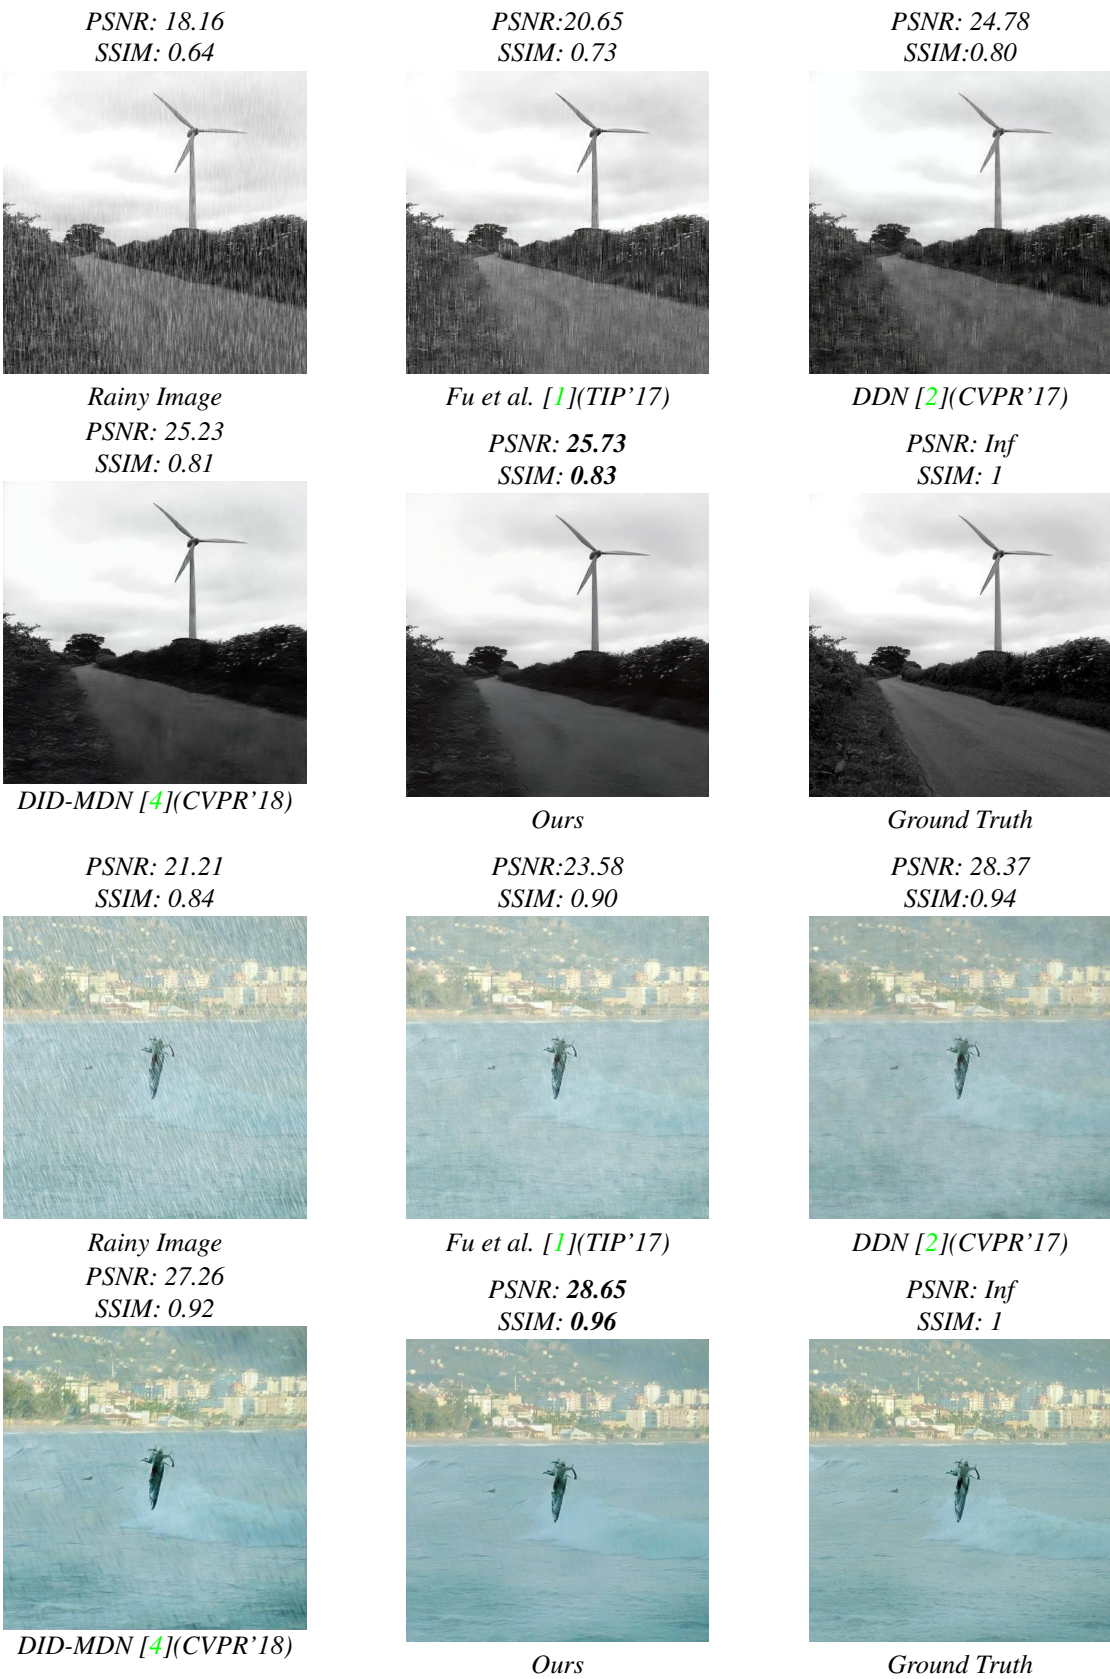

Figure 3: De-rained results on synthetic images from *Test-1* dataset from [4].



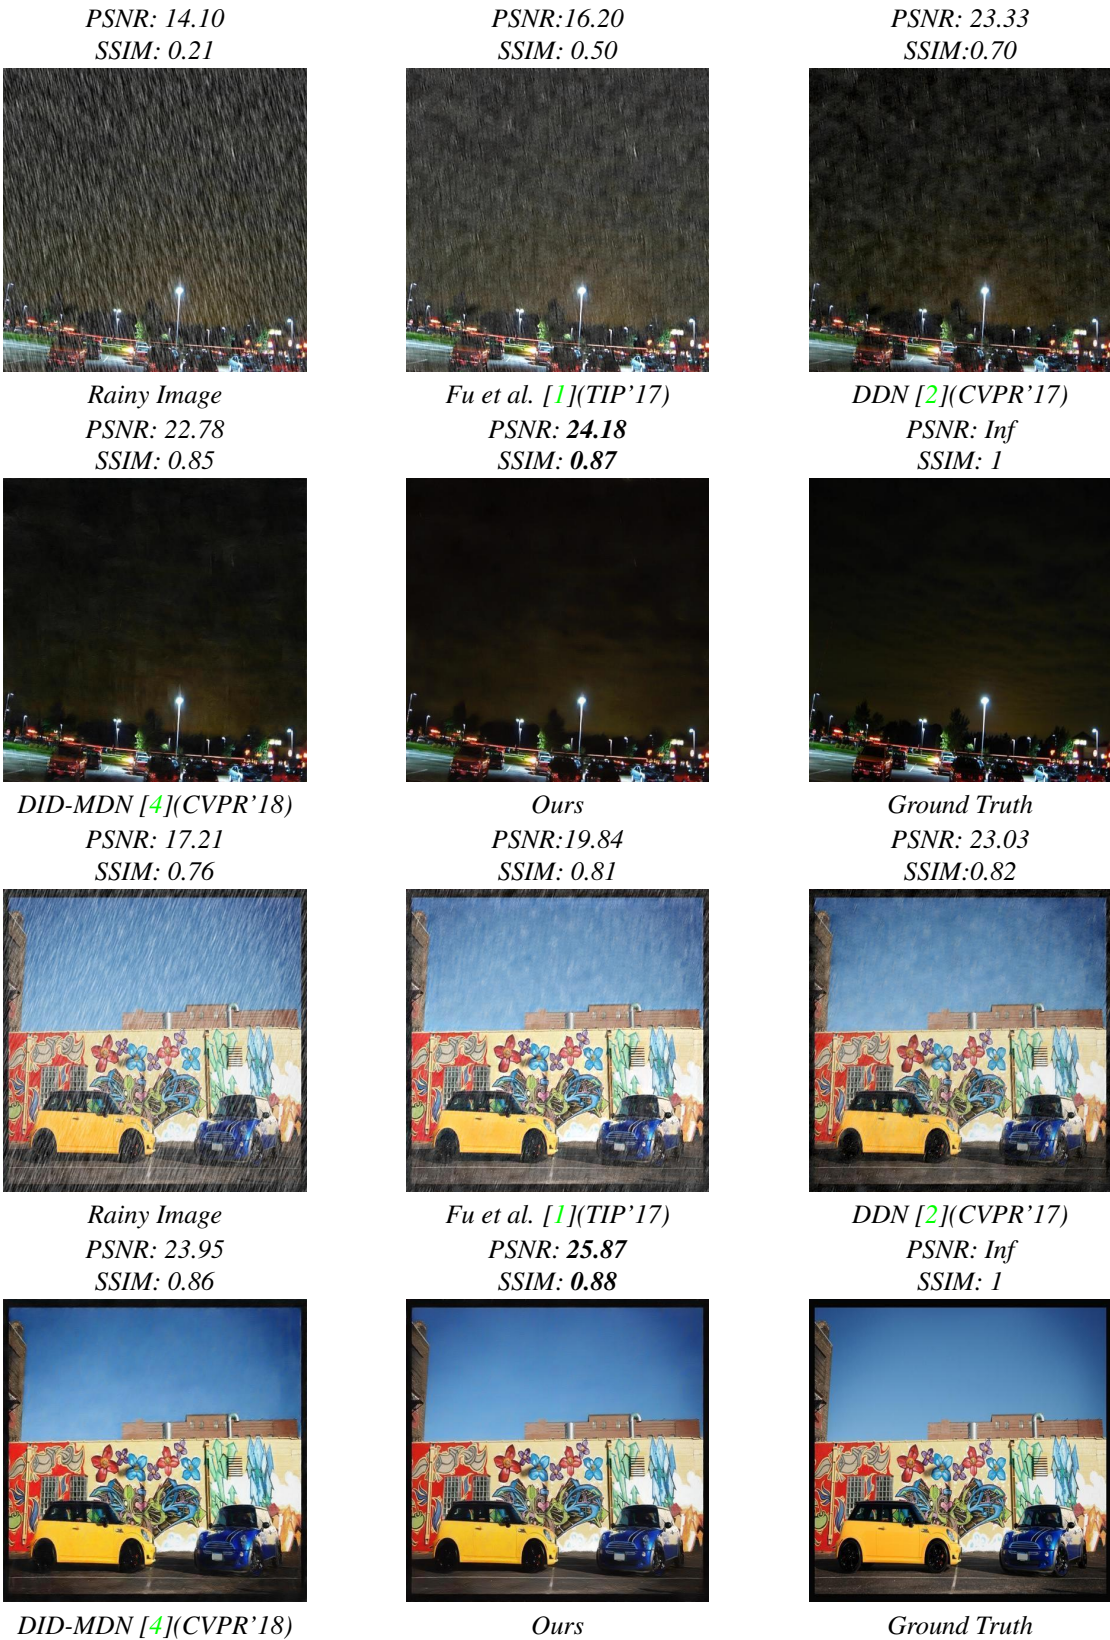

Figure 4: De-rained results on synthetic images from *Test-1* dataset from [4].



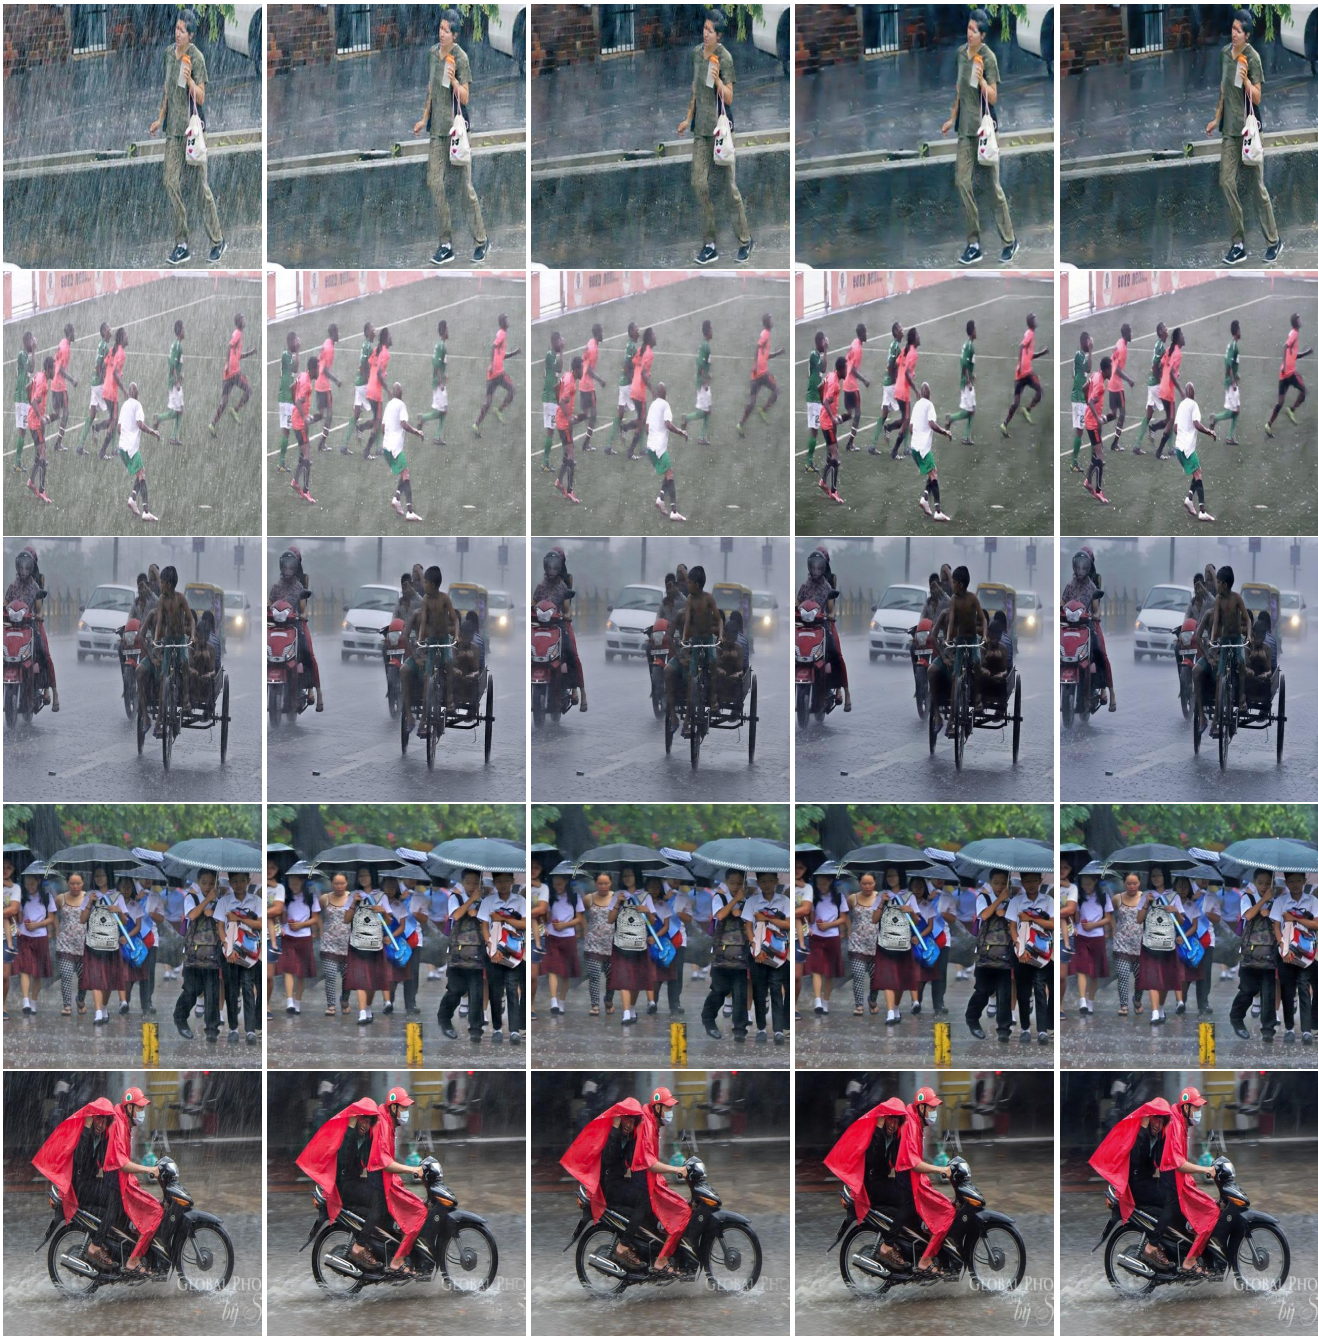

*Rainy Image*

*Fu et al.  
[1](TIP'17)*

*DDN  
[2](CVPR'17)*

*DID-MDN  
[4](CVPR'18)*

*Ours*

Figure 5: De-rained results on sample real-world images.
